# Supplementary material for: Low plasma PD-L1 levels, early tumor onset and absence of peritoneal carcinomatosis improve prognosis of women with advanced high-grade serous ovarian cancer
Source: Springer Nature journal article supplement (doi:10.1186/s12885-023-10911-5), 2023-05-13

## Supplementary Tables

**Table S1. Clinical and pathological characteristics of advanced HGSOc patients.**

| <b>Characteristic</b>            | <b>No. of Patients (%)</b> |
|----------------------------------|----------------------------|
| <b>Total patients</b>            | 100                        |
| <b>Age at diagnosis (y):</b>     |                            |
| Median: 61                       |                            |
| Mean: 60                         | 100                        |
| Range: 27-79                     |                            |
| <b>Age groups (y)</b>            |                            |
| ≤ 60                             | 48 (48)                    |
| > 60                             | 52 (52)                    |
| <b>FIGO stage <sup>a</sup></b>   |                            |
| IIIB                             | 23 (23)                    |
| IIIC                             | 52 (52)                    |
| IV                               | 25 (25)                    |
| <b>Histological grade</b>        |                            |
| G1/2                             | 0 (0)                      |
| G3                               | 100 (100)                  |
| <b>Histological subtype</b>      |                            |
| Serous                           | 100 (100)                  |
| Other                            | 0 (0)                      |
| <b>OC</b>                        |                            |
| Unilateral                       | 64 (64)                    |
| Bilateral                        | 36 (36)                    |
| <b>Surgery</b>                   |                            |
| Surgical staging                 | 52 (52)                    |
| Cytoreductive surgery            | 48 (48)                    |
| <b>Peritoneal carcinomatosis</b> |                            |
| Yes                              | 43 (43)                    |
| No                               | 57 (57)                    |
| <b>BMI</b>                       |                            |
| ≤ 25                             | 59 (59)                    |
| > 25                             | 41 (41)                    |
| <b>Smoker</b>                    |                            |
| Yes                              | 23 (23)                    |
| No                               | 77 (77)                    |

<sup>a</sup> AJCC Cancer Staging Manual 8th staging.

Abbreviations: BMI, Body Mass Index; FIGO, International Federation of Gynecology and Obstetrics.

**Table S2. Characteristics of ELISAs for sPD-L1, sPD-1, pan-sBTN3As, sBTN3A1, sBTN2A1, and sBTLA.**

|                                | PD-L1                                             | PD-1                  | pan-BTN3As*              | BTN3A1*                      | BTN2A1                                                 | BTLA                                                |
|--------------------------------|---------------------------------------------------|-----------------------|--------------------------|------------------------------|--------------------------------------------------------|-----------------------------------------------------|
| Coating Ab                     | $\alpha$ -PD-L1<br>1.8 +<br>$\alpha$ PD-L1<br>2.1 | $\alpha$ -PD-1<br>6.4 | $\alpha$ -BTN3A<br>S148  | $\alpha$ -<br>BTN3A1<br>S240 | $\alpha$ -<br>BTN2A1 8.16                              | $\alpha$ -BTLA<br>75.2                              |
| Detection Ab<br>(biotinylated) | A-PD-L1<br>1.3.1                                  | $\alpha$ -PD-1<br>3.1 | $\alpha$ -BTN3A<br>103.2 | $\alpha$ -BTN3A<br>103.2     | $\alpha$ -BTN2A1<br>4.15<br>+ $\alpha$ -BTN2A1<br>5.28 | $\alpha$ -BTLA<br>7.1<br>+<br>$\alpha$ -BTLA<br>8.2 |
| Detection<br>limit (pg/ml)     | 20                                                | 50                    | 100                      | 100                          | 30                                                     | 200                                                 |

\* Three isoforms of BTN3A are identified (A1, A2, A3). Among available monoclonal antibodies to BTN3A, one is specific for A1 ( $\alpha$ -BTN3A1 S240). Coating with  $\alpha$ -BTN3A1 S240 allows specific assay of the A1 isoform, whereas the couple of antibodies  $\alpha$ -BTN3A S148 and  $\alpha$ -BTN3A 103.2 allows simultaneous detection of all 3 forms (Pan-BTN3A assay). It is however noteworthy that BTN3A concentrations obtained with the Pan-BTN3A assay are only indicative since the range used in the assay is pure BTN3A1. BTN3A concentrations should therefore be expressed as pg/ml « equivalent BTN3A1 ».

**Table S3. Univariate and multivariate analysis of biomarkers and other factors for PFS in the validation cohort.**

| Factor/biomarker                         | Univariate Cox Regression |                 | Multivariable Cox Regression |                 |
|------------------------------------------|---------------------------|-----------------|------------------------------|-----------------|
|                                          | HR (95% CI)               | <i>p</i> -Value | HR (95% CI)                  | <i>p</i> -Value |
| Age at diagnosis<br>(>60 vs ≤60 years)   | 5.64 (2.03-15.6)          | 0.0009          | 8.12 (2.24-29.5)             | 0.0015          |
| BMI<br>(>25 vs ≤25)                      | 33.1 (4.14-265)           | 0.001           | -                            | NS              |
| Peritoneal carcinomatosis<br>(Yes vs No) | 12.7 (3.65-44.2)          | 0.0001          | 48.9 (6.98-343)              | 0.0001          |
| sPD-L1<br>(>0.42 vs ≤0.42 ng/mL)         | 4.30 (1.55-11.9)          | 0.005           | 4.47 (1.30-15.3)             | 0.02            |
| sPD-1<br>(>2.48 vs ≤2.48 ng/mL)          | 26.5 (3.29-213)           | 0.0021          | -                            | NS              |
| sBTN3A1<br>(>4.75 vs ≤4.75 ng/mL)        | 34.1 (4.18-277)           | 0.001           | -                            | NS              |
| pan-sBTN3As<br>(>13.06 vs ≤13.06 ng/mL)  | 4.30 (1.46-12.7)          | 0.008           | -                            | NS              |
| sBTN2A1<br>(>5.59 vs ≤5.59 ng/mL)        | 5.86 (1.93-17.8)          | 0.002           | -                            | NS              |
| sBTLA<br>(>2.78 vs ≤2.78 ng/mL)          | 6.14 (2.04–18.5)          | 0.0013          | -                            | NS              |

Abbreviations: BMI, Body Mass Index; HR, Hazard Ratio; NS, Not Significant.

**Figure S1. Receiver Operating Characteristics (ROC) curve analysis of age at diagnosis, BMI and plasma levels of PD-L1, PD-1, BTN3A1, pan-BTN3As, BTN2A1, BTLA.**

For each parameter, ROC curves were plotted for sensitivity and specificity of survival classification. The figure shows the optimal values of specificity and sensitivity for optimal threshold values (*Youden index* associated criterion). AUC, Area Under the Curve.  $P < 0.05$ .

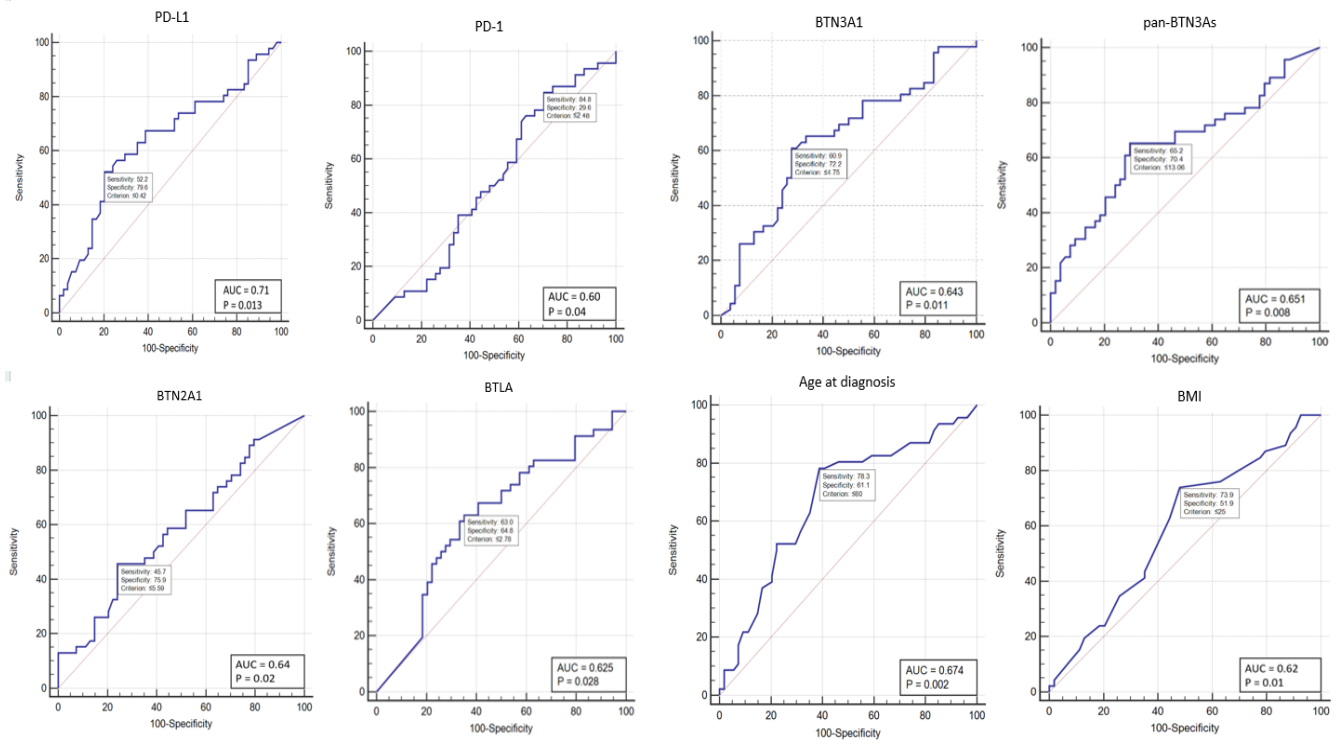

Supplement: MOESM1 [file 25356634]
